# Supplementary material for: Disruption of LLM9428/OsCATC Represses Starch Metabolism and Confers Enhanced Blast Resistance in Rice
Source: MDPI journal article supplement (doi:10.3390/ijms23073827), 2022-03-30

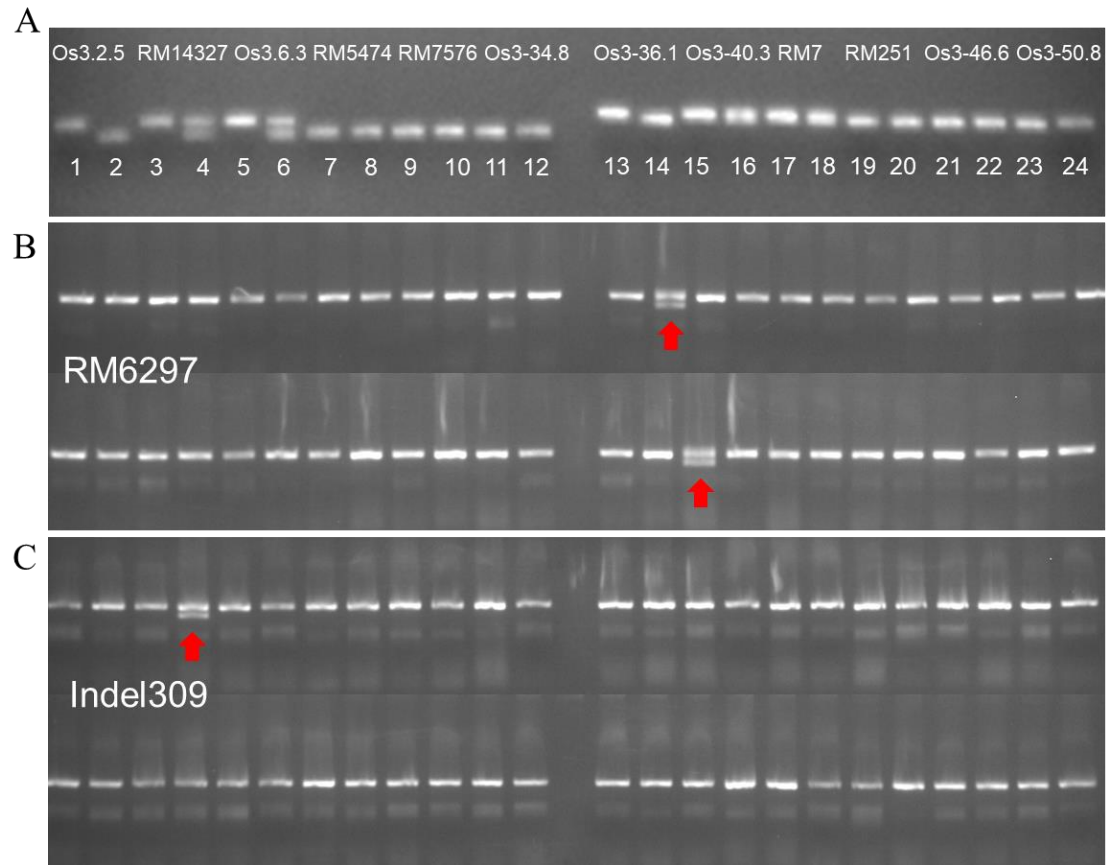

**Figure S1: SSR marker analysis for Primary and fine mapping of *LLM9428***

**(A)** Primary gene mapping of *LLM9428* between SSR markers RM5474 and Os. 3.6.3. Odd number (1, 3, 5, ...) refers to the plants without lesions phenotype (dominant plants) and even number (2, 4, 6, ...) refers to the plants with lesions phenotype (recessive plants). **(B)** The molecular marker RM6297 showing polymorphic bands in  $F_2$  recessive plants. **(C)** The molecular marker Indel309 showing polymorphism in  $F_2$  recessive plants.

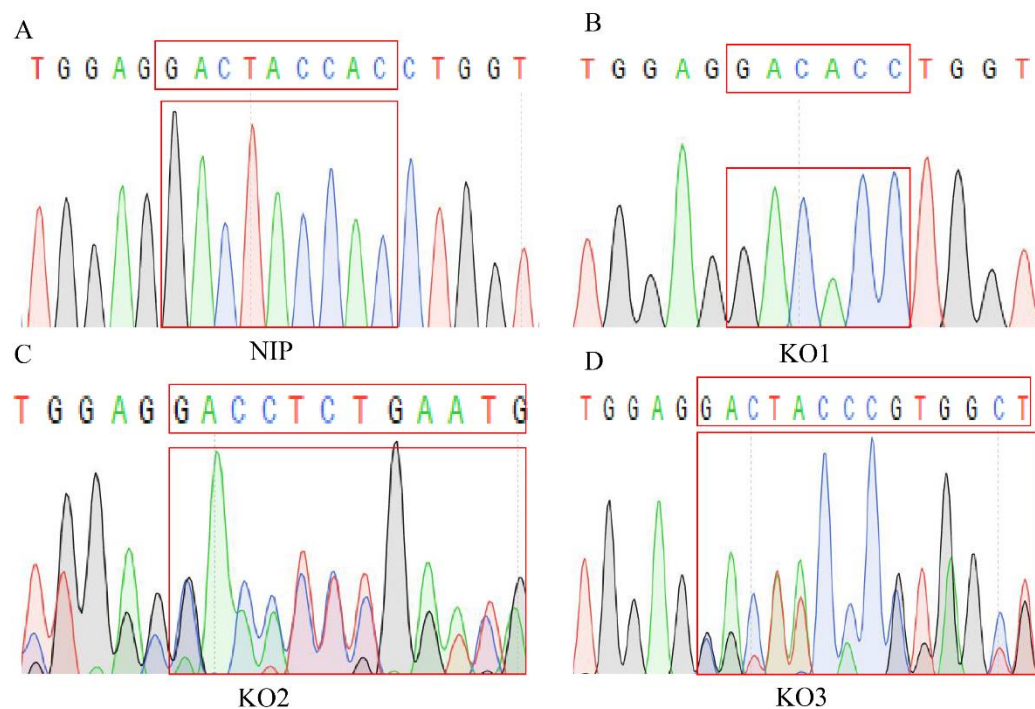

**Figure S2: Chromatograms of NIP and CRISPR-KO lines**

**(A)** Chromatogram of NIP showing the sequence of *LLM9428*, **(B)** Chromatogram of KO1 showing the sequence of *LLM9428*, **(C)** Chromatogram of KO2 showing the sequence of *LLM9428*, **(D)** Chromatogram of KO3 showing the sequence of *LLM9428*.

**Table S1. List of primers used in quantitative real-time PCR.**

| Primer  | Forward primer           | Reverse primer           |
|---------|--------------------------|--------------------------|
| ACTIN   | ACCATTGGTGCTGAGCGTTT     | CGCAGCTTCCATTCTATGAA     |
| LLM9428 | TTGCCAAGGAGAACAACCTCAAGC | TGATGAACCGGTCTTGCCTTGC   |
| PR1a    | CGTGTCGGCGTGGGTGT        | GGCGAGTAGTTGCAGGTGATG    |
| PR1b    | TACGCCAGCCAGAGGAGC       | GCCGAACCCCAAGAAGAGG      |
| PR10    | AAGTTGCAGGTGGGGGATA      | CTCAATGGCGTCGATGAAG      |
| OsSSI   | TATAAGGCCCGATGTGCCTCTG   | GTCACCAGATCCAAGCATGACG   |
| OsSSIIb | TGGAGATGCAGGTGCAGTAAGC   | CCACAACATCTCCAAGACCACCTG |
| OsBEIIb | TTGCACCAAGTAGTCGTTTCGG   | GGTATTATTTGACGCATGGCTGTG |
| OsAGPL1 | ATGTGCTCCTGTTGGAGAGAGTCG | TACACGGCCTGAACTGTGGAAC   |
| OsAGPL3 | ACTGCTGGCTGAAGGAAAGGTTT  | TATCTGCTTCTGTACACCCTCAG  |
| OsTPT1  | TGTCCTTGGACAGCAAGTTCCC   | TGATGCCATTGAAACACCAAGCAC |
| OsTPT2  | CATTTGCCCACACCATTAAAGCTC | TGCTGGCCAAGGATAAACTGTG   |
| OsSUT2  | ACCATATGCAATGGCTGCTAGTCG | ACCCAGTGACACAATAACCTGTGG |
| OsSUT4  | AACAGGAGGTGGACAAGGTCTG   | CTGCGGAACAACGATTGCAAGG   |

**Table S2. List of primers used as SSR and Indel markers.**

| Primer    | Forward primer              | Reverse primer          |
|-----------|-----------------------------|-------------------------|
| Os3.2.5   | GGTTATGATTCGTTGGAAAA        | AAACAAATACTCCCTCTCAAAA  |
| RM14327   | GATGCAGTAGGAACACCAACAGC     | ATCGAGTACCAAGTGCCTGTGC  |
| Os3.6.3   | TCATGTCCTCACTTTAACCC        | CTCTTGAATCCCTCTCACAG    |
| Os3.11.5  | ACATGTCATCTTCTCTCGCTACC     | GGAGACCACTCGTCACTTCG    |
| RM5474    | GTGGGTTTGTGTTTGGAGAGACG     | GTGTTGGTGAGCATAGCAGTTGG |
| RM7576    | CTGCCCTGCCTTTTGTACAC        | GCGAGCATTCTTTCTTCCAC    |
| Os3-34.8  | TCTTGCACTGTTCTTCAATC        | GACTCCTTCTCGCTACTTA     |
| Os3-36.1  | CTCCTTCTCTCGTCTC            | CAACGGCATAACACCATT      |
| Os3_40.3  | ACAAGCATCCCTATGAAAGA        | ATCACCGATATGAGCAATTC    |
| RM7(3-9)  | TTCGCCATGAAGTCTCTCG         | CCTCCCATCATTTGCTTGT     |
| RM251     | GAATGGCAATGGCGCTAG          | ATGCGGTTCAAGATTCGATC    |
| Os3-46.6  | ACATCGAGTTTAATTGGCAT        | AGAGAGAAAAGGTAGGTGGG    |
| Os3-50.8  | TTTGGAGTTAGTAGTGGGCT        | CGAGTTCTTCTGATCTGTT     |
| RM6297    | CTCTCCTCTCGCTCGCTGTTCC      | GAGTGGTAATTGGGCTTGGATGG |
| RM14315   | AACGGTAGCAATACGTTGATGG      | GATTGTGGTCATTTGCTTGC    |
| RM14360   | CTCCTTGGATTTGTGCTTGTGC      | CCTATAGCCCTCCTCTCCTTTGC |
| Indel-303 | TGTGTGAGATGTTCCCTGTTT       | CGTGGCACAACAAATTGAGA    |
| Indel-304 | AGAAGGGGTCGGTTGAGTTT        | TCTAACGGATAGCGGTGGAC    |
| Indel-306 | GGGGCGATATTCTACCATCA        | TTCAGGCACTTTAGCTGCAA    |
| Indel-309 | GCAATGTGATATTTGTACAGAAAAGTG | TGCTTATCGGTTCTGACAGC    |
| Indel-312 | ACGGACCAGCAGAATACACC        | AAGGCCGAGACCGAATTTAT    |
| Indel-313 | CATGATTCTGCAATTTATCAAC      | GGTGTGGTGCAGGTAAC       |
| Indel-319 | GTATACTACCCGAATTGTCACG      | GATCTGTGAGTTTGGGATGG    |

Table S3. Genetic linkage map of chromosome 3 markers, primer, physical location and genetic distance

| Marker No. | Primer    | Physical location (Japonica database cv.02428) | Genetic Distance (cM) |
|------------|-----------|------------------------------------------------|-----------------------|
| ori        |           |                                                | 0                     |
| 3-1        | os3-2.5   | 8901110                                        | 3.2                   |
| 3-2        | RM14327   | 1507052                                        | 5.4                   |
| 3-3        | os3-6.3   | 1523578                                        | 5.4                   |
| 3-4        | RM5474    | 3804260                                        | 13.6                  |
| 3-5        | RM7576    | 6079402                                        | 21.7                  |
| 3-6        | os3-34.8  | 6961942                                        | 24.9                  |
| 3-7        | os3-36.1  | 7050732                                        | 25.2                  |
| 3-8        | Os3_40.3  | 8298093                                        | 29.6                  |
| 3-9        | RM7       | 9829641                                        | 35.1                  |
| 3-10       | RM251     | 9949856                                        | 35.5                  |
| 3-11       | os3-46.6  | 10117095                                       | 36.1                  |
| 3-13       | RM5748    | 12327987                                       | 44.0                  |
| 3-14       | Os3_65.4  | 14473781                                       | 51.7                  |
| 3-15       | RM3204    | 14992775                                       | 53.5                  |
| 3-16       | RM7642    | 18632120                                       | 66.5                  |
| 3-17       | RM15281   | 18682472                                       | 66.7                  |
| 3-18       | RM3646    | 21997941                                       | 78.6                  |
| 3-19       | RM16      | 23127725                                       | 82.6                  |
| 3-20       | RM5626    | 24866396                                       | 88.8                  |
| 3-12       | os3-50.8  | 25591646                                       | 91.4                  |
| 3-22       | RM15721   | 25822460                                       | 92.2                  |
| 3-21       | RM426     | 27595690                                       | 98.6                  |
| 3-23       | RM8277    | 28811832                                       | 102.9                 |
| 3-24       | Os3_130.7 | 29437392                                       | 105.1                 |
| 3-25       | Os3_135.7 | 30066189                                       | 107.4                 |
| 3-26       | os3-136.5 | 30272881                                       | 108.1                 |
| 3-27       | RM3199    | 30422335                                       | 108.7                 |
| 3-28       | os3-142.3 | 31755536                                       | 113.4                 |
| 3-29       | RM143     | 33191366                                       | 118.5                 |
| 3-31       | RM422     | 33716593                                       | 120.4                 |
| 3-30       | RM3684    | 34623406                                       | 123.7                 |
| 3-32       | RM7389    | 36162247                                       | 129.2                 |
| 3-33       | RM85      | 36348226                                       | 129.8                 |
| end        | end       | 36413819                                       | 130.0                 |

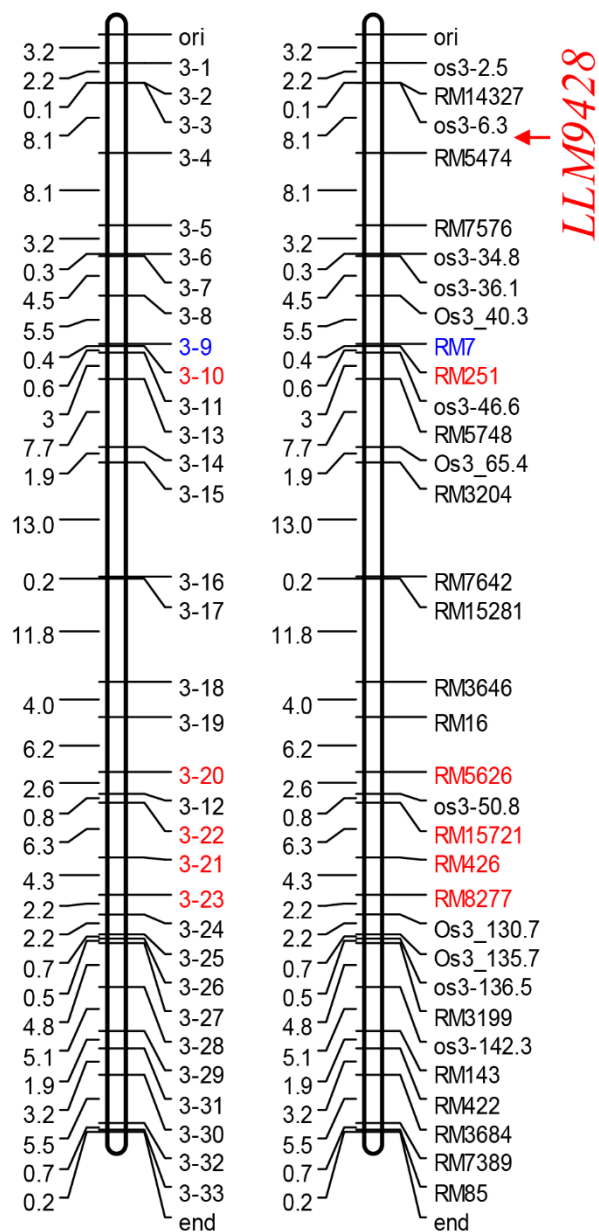

Supplement: s1 [file s1]
